# Supplementary material for: Using haplotypes for the prediction of allelic identity to fine-map QTL: characterization and properties
Source: PubMed Central journal article supplement (PMC4223544; doi:10.1186/1297-9686-46-45), 2014-07-14
Supplement: 1297-9686-46-45-S2.pdf [file 1297-9686-46-45-S2.pdf]

## Additional file 2

### Domains of LD coefficients and boundary conditions for the critical values of each $Q_p$ function

#### Domains of values for the multiallelic LD coefficients

Let  $\Delta_{\mathbf{p}}$  be the LD coefficient between haplotype  $h_p$  and allele  $a_1$  at the QTL, i.e.

$$\left\{ \begin{array}{l} \Delta_{\mathbf{p}} = f_{i,h_p a_1}^{QTL} - f_{i,h_p} f_{a_1} \quad (a) \\ -\Delta_{\mathbf{p}} = f_{i,h_p a_2}^{QTL} - f_{i,h_p} f_{a_2} \Leftrightarrow \Delta_{\mathbf{p}} = f_{i,h_p} f_{a_2} - f_{i,h_p a_2}^{QTL} \quad (b) \end{array} \right. \quad \left\{ \begin{array}{l} f_{i,h_p a_1}^{QTL} = f_{i,h_p} f_{a_1} + \Delta_{\mathbf{p}} \quad (c) \\ f_{i,h_p a_2}^{QTL} = f_{i,h_p} f_{a_2} - \Delta_{\mathbf{p}} \quad (d) \end{array} \right.$$

$\Delta_{\mathbf{p}}$  is maximum in (a) and (b) when  $f_{i,h_p a_1}^{QTL} = f_{a_1}$  and  $f_{i,h_p a_2}^{QTL} = 0$  respectively. Under these conditions we also have  $f_{i,h_p} = f_{i,h_p a_1}^{QTL} = f_{a_1}$  since  $f_{i,h_p} = f_{i,h_p a_1}^{QTL} + f_{i,h_p a_2}^{QTL} = f_{a_1} + 0$ . Hence  $\Delta_{\mathbf{p}}$  can be written as  $\Delta_{\mathbf{p}} = f_{i,h_p} - f_{i,h_p}^2 = f_{i,h_p}(1 - f_{i,h_p})$  under these conditions.  $f_{i,h_p}(1 - f_{i,h_p})$  is identifiable to the function  $x \mapsto x(1 - x)$  which takes a maximum value of  $\frac{1}{4}$  for  $x = \frac{1}{2}$ . One of the maximum possible value for  $\Delta_{\mathbf{p}}$  is thus given by  $\frac{1}{4}$ . In the same manner we can show that one of the minimum possible value for  $\Delta_{\mathbf{p}}$  is given by  $-\frac{1}{4}$ . Since  $f_{i,h_p a_1}^{QTL} \geq 0$  and  $f_{i,h_p a_2}^{QTL} \geq 0$  we also have  $\Delta_{\mathbf{p}} \geq -f_{i,h_p} \cdot f_{a_1}$  and  $\Delta_{\mathbf{p}} \leq f_{i,h_p} \cdot f_{a_2}$  from (c) and (d) respectively. Hence the complete domain of values for each  $\Delta_{\mathbf{p}}$  term is given by:  $\Delta_{\mathbf{p}} \in [\max(-\frac{1}{4}, -f_{i,h_p} \cdot f_{a_1}), \min(\frac{1}{4}, f_{i,h_p} \cdot f_{a_2})]$ .

#### Boundary conditions for the critical value of each $Q_p$ function

Each  $Q_p$  function is given by:

$$Q_p(\Delta_{\mathbf{p}}) = -4\Delta_{\mathbf{p}}^2 + \Psi_{pq}^{\text{IBShap}} \Delta_{\mathbf{p}} + \Phi_{pq}^{\text{IBShap}}$$

Differentiating  $Q_p$  with respect to  $\Delta_{\mathbf{p}}$  gives  $\Delta_{\mathbf{p}}^* = \frac{\Psi_{pq}^{\text{IBShap}}}{8}$  where  $\Psi_{pq}^{\text{IBShap}}$  is given by:

$$\Psi_{pq}^{\text{IBShap}} = 3(\tilde{\alpha}_p - \alpha_p) + \sum_{q \neq p}^K (\alpha_q - \tilde{\alpha}_q)$$

See expression (3), with  $s_{i,h_p,h_p}^{\mathcal{P}} = 1$  and  $s_{i,h_p,h_q}^{\mathcal{P}} = 0$ , in Additional file 1 for  $\Psi_{pq}^{\text{IBShap}}$  and the corresponding products of frequencies for  $\alpha_p$  and  $\tilde{\alpha}_p$ .

$$\begin{aligned} \Psi_{pq}^{\text{IBShap}} &= 3(\tilde{\alpha}_p - \alpha_p) + \sum_{q \neq p}^K (\alpha_q - \tilde{\alpha}_q) \\ &= 3(\tilde{\alpha}_p - \alpha_p) + \sum_{q \neq p}^K (\alpha_q - \tilde{\alpha}_q) + \alpha_p - \tilde{\alpha}_p - (\alpha_p - \tilde{\alpha}_p) \\ &= 4(\tilde{\alpha}_p - \alpha_p) + \sum_{q=1}^K (\alpha_q - \tilde{\alpha}_q) \\ &= 4f_{i,h_p}(f_{a_2} - f_{a_1}) + (f_{a_1} - f_{a_2}) \sum_{q=1}^K f_{i,h_q} = (f_{a_1} - f_{a_2})[1 - 4f_{i,h_p}] \end{aligned}$$

Hence we have  $\Delta_{\mathbf{p}}^* = \frac{(f_{a_1} - f_{a_2})[1 - 4f_{i,h_p}]}{8} = \frac{(2f_{a_1} - 1)[1 - 4f_{i,h_p}]}{8}$ . Let  $\Delta_{\mathbf{pmin}} = \max(-\frac{1}{4}, -f_{i,h_p} \cdot f_{a_1})$  and  $\Delta_{\mathbf{pmax}} = \min(\frac{1}{4}, f_{i,h_p} \cdot f_{a_2})$ . Note that  $0 \in ]\Delta_{\mathbf{pmin}}, \Delta_{\mathbf{pmax}}[$ . Hence if  $\Delta_{\mathbf{p}}^* \in ]\Delta_{\mathbf{pmin}}, \Delta_{\mathbf{pmax}}[$  and the magnitude (absolute value) of  $\Delta_{\mathbf{p}}$  increases sufficiently  $Q_p$  will decrease. Figure 8 gives an example of a  $Q_p$  function with  $\Delta_{\mathbf{p}}^* \in ]\Delta_{\mathbf{pmin}}, \Delta_{\mathbf{pmax}}[$ .

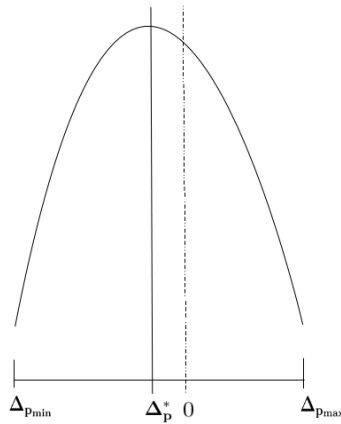

FIGURE 8: An example of a  $Q_p$  function with  $\Delta_{\mathbf{p}}^* \in ]\Delta_{\mathbf{pmin}}, \Delta_{\mathbf{pmax}}[$ .

The only situations for which it is not possible to tell if  $Q_p$  will decrease, as the magnitude of  $\Delta_{\mathbf{p}}$  increases sufficiently, are given by the following conditions;  $\Delta_{\mathbf{p}}^* \leq \Delta_{\mathbf{pmin}}$  (e) or  $\Delta_{\mathbf{p}}^* \geq \Delta_{\mathbf{pmax}}$  (f). In these situations  $Q_p$  can either decrease or increase if the magnitude of  $\Delta_{\mathbf{p}}$  increases sufficiently. Figure 9 gives an example of a  $Q_p$  function with  $\Delta_{\mathbf{p}}^* \leq \Delta_{\mathbf{pmin}}$ .

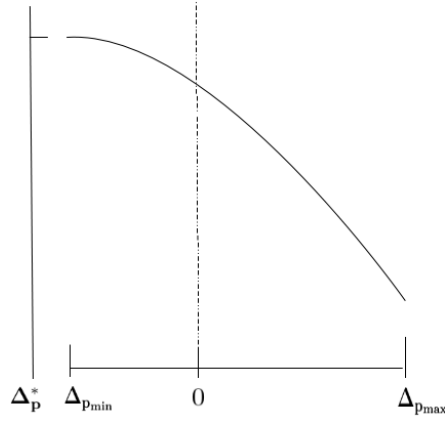

FIGURE 9: An example of a  $Q_p$  function with  $\Delta_{\mathbf{p}}^* \leq \Delta_{\mathbf{pmin}}$ .

Conditions (e) and (f) can be written as follows:

$$\begin{aligned}
 (e) \left\{ \begin{array}{l} \text{If } \Delta_{\mathbf{pmin}} = -\frac{1}{4} \text{ then } \Delta_{\mathbf{p}}^* \leq \Delta_{\mathbf{pmin}} \Leftrightarrow (2f_{a_1} - 1)[1 - 4f_{i,h_p}] \leq -2 \\ \text{or} \\ \text{If } \Delta_{\mathbf{pmin}} = -f_{i,h_p} \cdot f_{a_1} \text{ then } \Delta_{\mathbf{p}}^* \leq \Delta_{\mathbf{pmin}} \Leftrightarrow \frac{(2f_{a_1} - 1)[1 - 4f_{i,h_p}]}{f_{i,h_p} \cdot f_{a_1}} \leq -8 \end{array} \right. \\
 (f) \left\{ \begin{array}{l} \text{If } \Delta_{\mathbf{pmax}} = \frac{1}{4} \text{ then } \Delta_{\mathbf{p}}^* \geq \Delta_{\mathbf{pmax}} \Leftrightarrow (2f_{a_1} - 1)[1 - 4f_{i,h_p}] \geq 2 \\ \text{or} \\ \text{If } \Delta_{\mathbf{pmax}} = f_{i,h_p}(1 - f_{a_1}) \text{ then } \Delta_{\mathbf{p}}^* \geq \Delta_{\mathbf{pmax}} \Leftrightarrow \frac{(2f_{a_1} - 1)[1 - 4f_{i,h_p}]}{f_{i,h_p}(1 - f_{a_1})} \geq 8 \end{array} \right.
 \end{aligned}$$

Let  $w$ ,  $t$ ,  $s$  and  $u$  be the following functions of  $f_{a_1}$  and  $f_{i,h_p}$ ;  $w(f_{a_1}, f_{i,h_p}) = (2f_{a_1} - 1)[1 - 4f_{i,h_p}] + 2$ ,  $t(f_{a_1}, f_{i,h_p}) = \frac{(2f_{a_1} - 1)[1 - 4f_{i,h_p}]}{f_{i,h_p} \cdot f_{a_1}} + 8$ ,  $s(f_{a_1}, f_{i,h_p}) = (2f_{a_1} - 1)[1 - 4f_{i,h_p}] - 2$  and  $u(f_{a_1}, f_{i,h_p}) = \frac{(2f_{a_1} - 1)[1 - 4f_{i,h_p}]}{f_{i,h_p}(1 - f_{a_1})} - 8$ . Conditions (e) and (f) are the same as searching values of  $f_{a_1}$  and  $f_{i,h_p}$  for which we have:

$$(e) \left\{ \begin{array}{l} w \leq 0 \\ \text{or} \\ t \leq 0 \end{array} \right. \quad (f) \left\{ \begin{array}{l} s \geq 0 \\ \text{or} \\ u \geq 0 \end{array} \right.$$

Figure 10 shows the regions (red colored), for different  $a_1$  and  $h_p$  frequencies, where condition (e) or (f) is realized. As can be seen in figure 10, the conditions for  $w$ ,  $t$ ,  $s$  and  $u$  are verified when  $f_{a_1}$  and  $f_{i,h_p}$  are both high or both low, or one of these two frequencies is high and the other one is low. Note that these frequencies correspond to situations where  $Q_p$  can still decrease as suggested by figure 11 (see relation between the sum of the squared deviations and  $D_{i,QTL}^2$ ).

Moreover these frequencies correspond to situations which are unfavorable for QTL analysis as low frequencies do not allow for reliable estimation and comparison of contrasts between groups of individuals. Finally note that LD requires variation of alleles between loci to exist. Hence these high or low frequencies correspond to situations which are unfavorable for LD mapping of QTL.

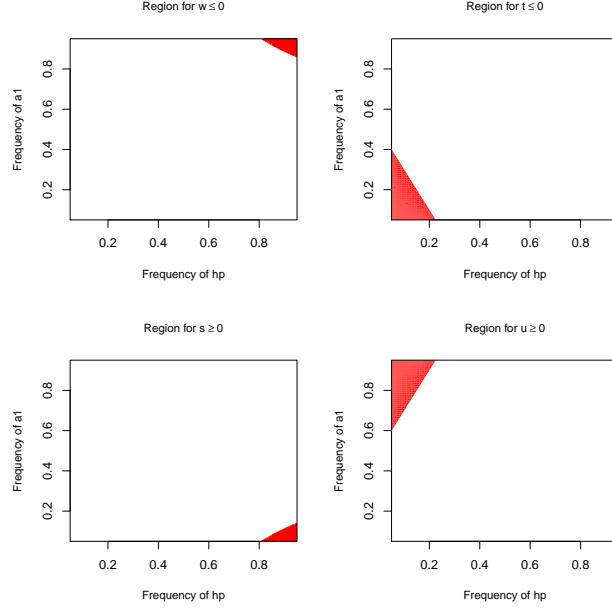

FIGURE 10: The different regions (red colored) where condition (e) or (f) is realized.

### Relation between the sum of the squared deviations and $D_{i, QTL}^2$

Let  $D_{i, QTL}^2 = 2 \sum_{p=1}^K \Delta_{\mathbf{p}}^2$  be the non-normalized multiallelic measure of LD and  $SD_{i, QTL} = \sum_{p=1}^K (\Delta_{\mathbf{p}} - \Delta_{\mathbf{p}}^*)^2$  be the sum of the squared deviations of the multiallelic LD coefficients from their corresponding  $\Delta_{\mathbf{p}}^*$  critical values.  $SD_{i, QTL}$  can be written as a sum of convex  $U_p$  functions of each LD coefficient, i.e.

$$SD_{i, QTL} = \sum_{p=1}^K (\Delta_{\mathbf{p}} - \Delta_{\mathbf{p}}^*)^2 = \sum_{p=1}^K \Delta_{\mathbf{p}}^2 - \omega \Delta_{\mathbf{p}} + v = \sum_{p=1}^K U_p(\Delta_{\mathbf{p}})$$

where  $\omega = 2\Delta_{\mathbf{p}}^*$  and  $v = \Delta_{\mathbf{p}}^{*2}$ , and the critical value of each  $U_p$  function is  $\Delta_{\mathbf{p}}^*$ . Hence there is an implicit relationship between  $D_{i, QTL}^2$  and  $SD_{i, QTL}$ . If the sum of the squared  $\Delta_{\mathbf{p}}$  terms increases sufficiently (i.e.  $\frac{D_{i, QTL}^2}{2}$  increases sufficiently)  $SD_{i, QTL}$  will increase. The same procedure as the one used to describe the expected behavior of  $D_{i, QTL}^2$  was repeated for  $SD_{i, QTL}$  and  $\frac{D_{i, QTL}^2}{2}$  on the 889 FLW regions (see variation of LD subsection in methods). That is both  $\Delta_{\mathbf{p}}$  and  $\Delta_{\mathbf{p}}^*$  were computed at

each tested position, in order to compute  $SD_{i,QTL}$  and  $\frac{D_{i,QTL}^2}{2}$ , while screening the 889 regions. Figure 11 shows the profiles of the empirical means of the 889 FLW curves for  $SD_{i,QTL}$  and  $\frac{D_{i,QTL}^2}{2}$ , and the deviation ( $\mathbb{E}[SD_{i,QTL} - \frac{D_{i,QTL}^2}{2}] = \mathbb{E}[-\omega\Delta_{\mathbf{p}} + v]$ ) between these two profiles. As observed in figure 11, the profiles for the expected values of  $SD_{i,QTL}$  and  $\frac{D_{i,QTL}^2}{2}$  exhibit similar patterns with a relatively small increasing deviation, between these two profiles, as the tested position moves toward the QTL. Note that the profile for the deviation exhibit a similar trend to the profiles for the expected values of  $SD_{i,QTL}$  and  $\frac{D_{i,QTL}^2}{2}$ .

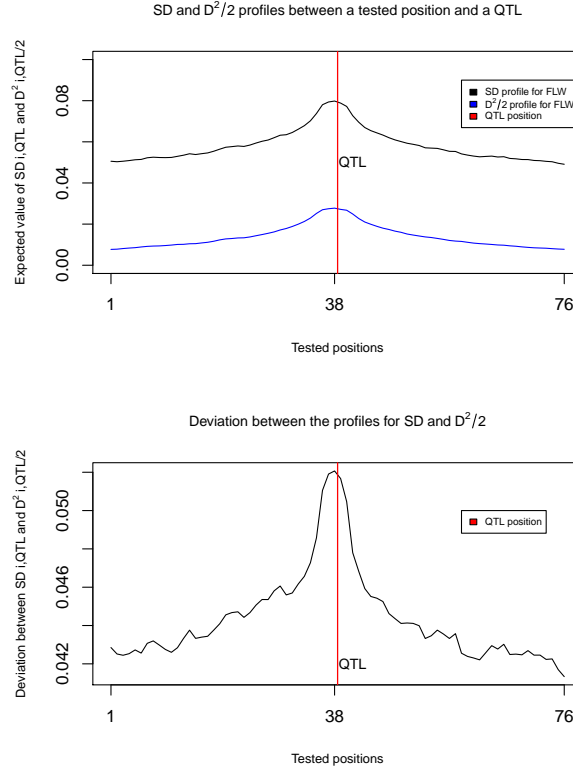

FIGURE 11: Empirical means of the 889 FLW curves, obtained for  $D_{i,QTL}^2$  and  $SD_{i,QTL}$  between tested positions (tested position  $i$  = center of 6 marker haplotypes) and a biallelic QTL (red vertical line) for regions of 81 markers on chromosomes, and the deviation between the mean curves.
